# Supplementary material for: Multiviz: a smart visualization system for real-time financial trading operations
Source: PeerJ journal article supplement (doi:10.7717/peerj-cs.3575), 2026-01-30
Supplement: questionnaireenglish.pdf [file questionnaireenglish.pdf]

**PARTICIPANT NO:**

### MULTIVIZ EXPERIMENT QUESTIONNAIRE

Please select the answer that best expresses how you feel about each after using the system in two different settings. The first one is for list view you have used. The second multiviz is for graphical display. We are NOT grading or measuring your performance in our study. We are developing an interface for financial data and want to compare two.

Feel free to ask questions to the experimented.

#### CLASSICAL INTERFACE:

Please fill the following questions for the classical interface:

|                                                                                               | Strongly<br>Disagree     | Somewhat<br>Disagree     | Neutral                  | Somewhat<br>Agree        | Strongly<br>Agree        |
|-----------------------------------------------------------------------------------------------|--------------------------|--------------------------|--------------------------|--------------------------|--------------------------|
| 1. I think I would like to use this tool frequently.                                          | <input type="checkbox"/> |
| 2. I found the tool unnecessarily complex.                                                    | <input type="checkbox"/> |
| 3. I thought the tool was easy to use.                                                        | <input type="checkbox"/> |
| 4. I think that I would need the support of a technical person to be able to use this system. | <input type="checkbox"/> |
| 5. I found the various functions in this tool were well integrated.                           | <input type="checkbox"/> |
| 6. I thought there was too much inconsistency in this tool.                                   | <input type="checkbox"/> |
| 7. I would imagine that most people would learn to use this tool very quickly.                | <input type="checkbox"/> |
| 8. I found the tool very cumbersome to use.                                                   | <input type="checkbox"/> |
| 9. I felt very confident using the tool.                                                      | <input type="checkbox"/> |
| 10. I needed to learn a lot of things before I could get going with this tool.                | <input type="checkbox"/> |

Comments:

(continue other side)

**MULTIVIZ INTERFACE:**

Please fill the following questions for the Multiviz color interface:

|                                                                                               | Strongly Disagree        | Somewhat Disagree        | Neutral                  | Somewhat Agree           | Strongly Agree           |
|-----------------------------------------------------------------------------------------------|--------------------------|--------------------------|--------------------------|--------------------------|--------------------------|
| 1. I think I would like to use this tool frequently.                                          | <input type="checkbox"/> |
| 2. I found the tool unnecessarily complex.                                                    | <input type="checkbox"/> |
| 3. I thought the tool was easy to use.                                                        | <input type="checkbox"/> |
| 4. I think that I would need the support of a technical person to be able to use this system. | <input type="checkbox"/> |
| 5. I found the various functions in this tool were well integrated.                           | <input type="checkbox"/> |
| 6. I thought there was too much inconsistency in this tool.                                   | <input type="checkbox"/> |
| 7. I would imagine that most people would learn to use this tool very quickly.                | <input type="checkbox"/> |
| 8. I found the tool very cumbersome to use.                                                   | <input type="checkbox"/> |
| 9. I felt very confident using the tool.                                                      | <input type="checkbox"/> |
| 10. I needed to learn a lot of things before I could get going with this tool.                | <input type="checkbox"/> |

Comments:

Do you suggest this method to others?:

How can we improve our interface further:

Thank you. This is the end of experiment.
