# Supplementary material for: Multiviz: a smart visualization system for real-time financial trading operations
Source: PeerJ journal article supplement (doi:10.7717/peerj-cs.3575), 2026-01-30
Supplement: tasks.pdf [file tasks.pdf]

**Please Do Your Best. We are not measuring or recording YOUR performance.. We are recording interface performance for the project. The experiment is anonymous!**

**QUESTION 1:**

a. MULTIVIZ

The High Yield CDS sector has performed very well Year-To-Date (YTD), but in this sector, I want to select companies with the worst credit profiles to short; specifically, I need you to identify the 3 companies that have the best-performing CDS and the worst-performing Equity among those with the lowest Interest Coverage Ratios and largest Debt Outstanding Amounts. I intend to short the CDS of these identified companies.

b. LIST

The High Yield CDS sector has performed very well YTD, and in this sector, I want to choose companies with the best credit profiles to buy; specifically, I need you to find the 3 companies with the worst-performing CDS and lowest Volatility among those with the highest Interest Coverage Ratios and lowest Debt Outstanding Amounts. I intend to buy the CDS of these identified companies.

**QUESTION 2:**

c. LIST

Which companies have the lowest Option Volatility among those with Market Caps between 500 million and 60 billion, and CDS below 100? The market is about to enter risk-off mode, and from these companies, I want to short the CDS and/or options of those with the lowest Interest Coverage Ratios. Which companies are these?

d. MULTIVIZ

Which companies have the highest Option Volatility among those with Market Caps between 500 million and 60 billion, and CDS below 100? The market is about to enter risk-off mode, and from these companies, I want to short the CDS and/or options of those with the highest Interest Coverage Ratios. Which companies are these?
